# Supplementary material for: Transparent conducting oxide-free and Pt-free flexible dye-sensitized solar cells employing CuS-nanosheet networks as counter electrodes
Source: Royal Society of Chemistry journal article supplement (doi:10.1039/c6ta01353h), 2016-01-01
Supplement: c6ta01353h1.pdf [file c6ta01353h1.pdf]

## Supporting

### Transparent Conducting Oxide-Free and Pt-Free Flexible Dye-sensitized Solar Cells Employing CuS-Nanosheet Networks as Counter Electrodes

Xiaojia Zhang<sup>a</sup>, Wenxi Guo<sup>a,b\*</sup>, Caofeng Pan<sup>a\*</sup>

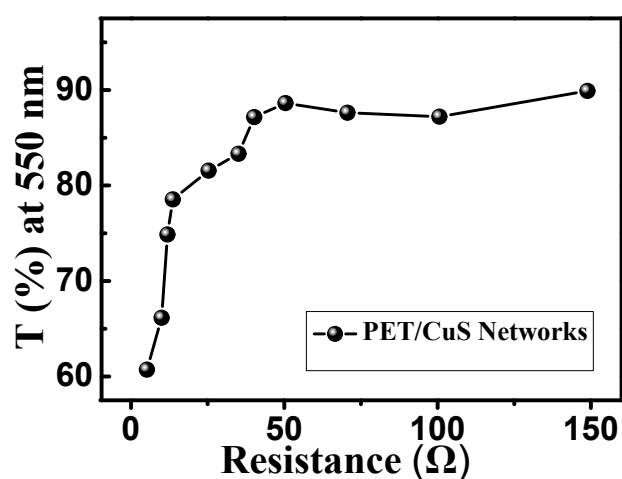

Figure S1. Transmittances of CuS NS network electrodes versus sheet resistances performance.

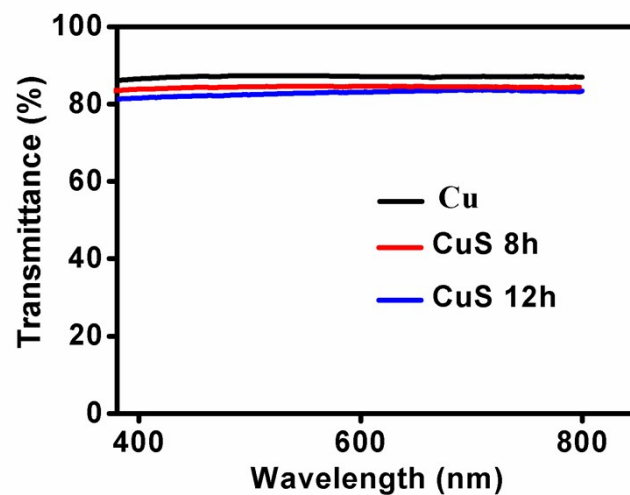

Figure S2. Transmittances of Cu networks electrode with different sulphur treatment time.

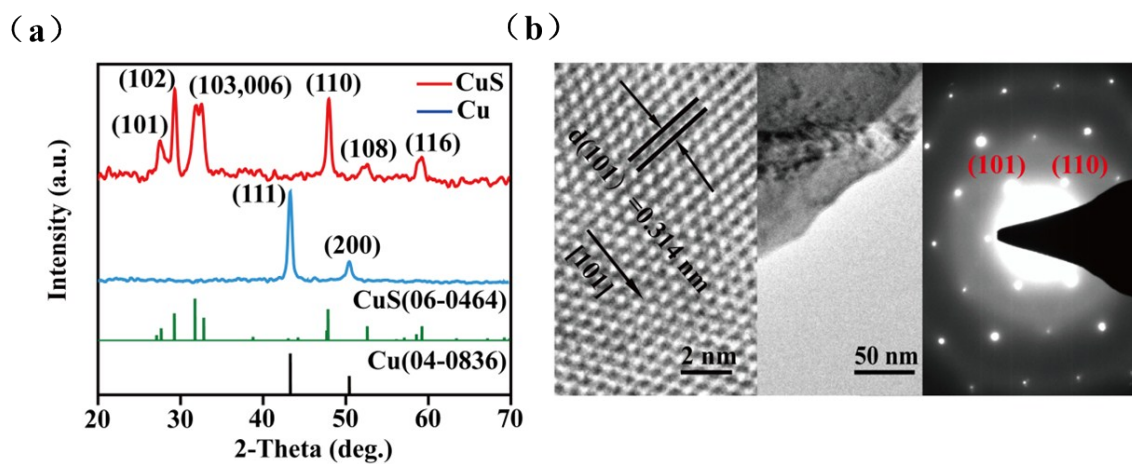

**Figure S3.** (a) XRD patterns of Cu and CuS NS networks; (b) TEM, HRTEM, and SADE images of CuS NS networks electrodes.

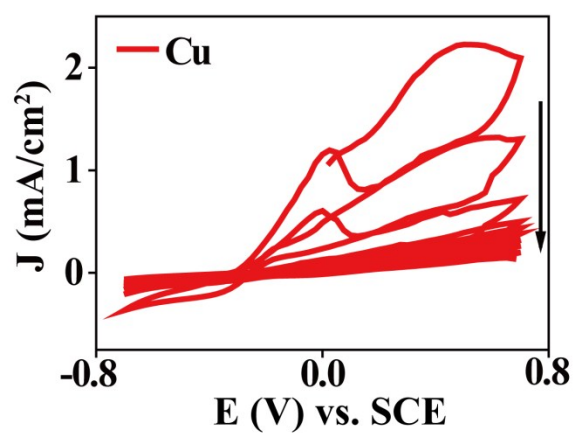

**Figure S4.** CV curves of Cu network electrode in the electrolyte for 50 cycles scan at 50V.

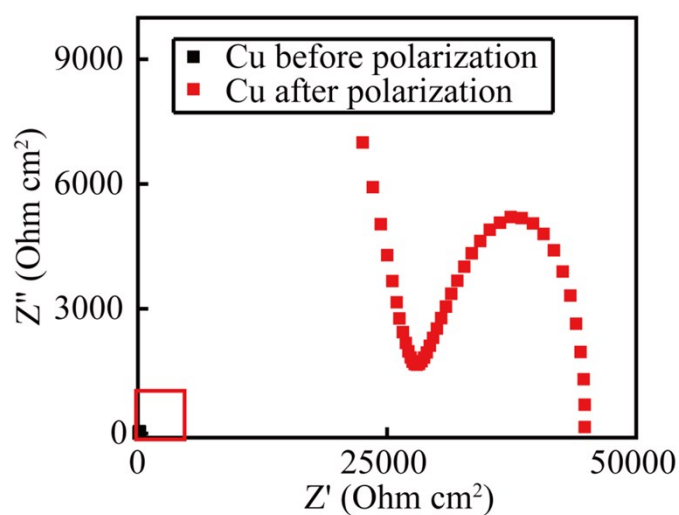

**Figure S5.** Plots of EIS of Cu network electrode before and after polarization.

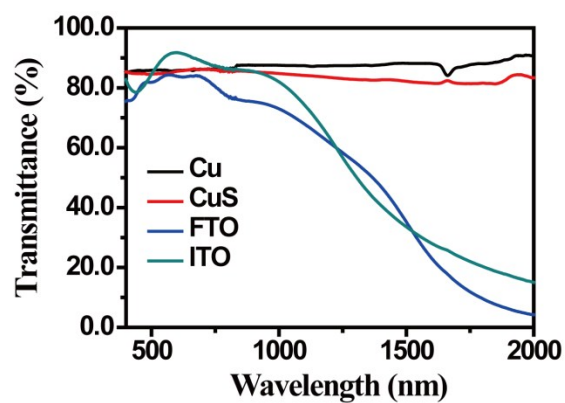

**Figure S6.** Transmittance of the Cu and CuS NS network/PET electrode, ITO/PET and FTO/PET electrodes.

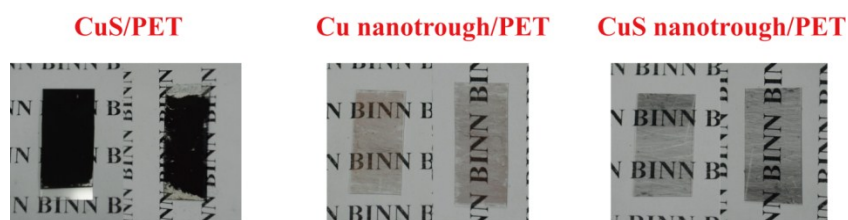

**Figure S7.** Potographs before (left side) and after (right side) bend test of the CuS/PET, Cu/PET and CuS NS/PET electrode.
